# Supplementary material for: Convergent Evolution of Hemoglobin Function in High-Altitude Andean Waterfowl Involves Limited Parallelism at the Molecular Sequence Level
Source: PubMed Central journal article supplement (PMC4670201; doi:10.1371/journal.pgen.1005681), 2015-12-04

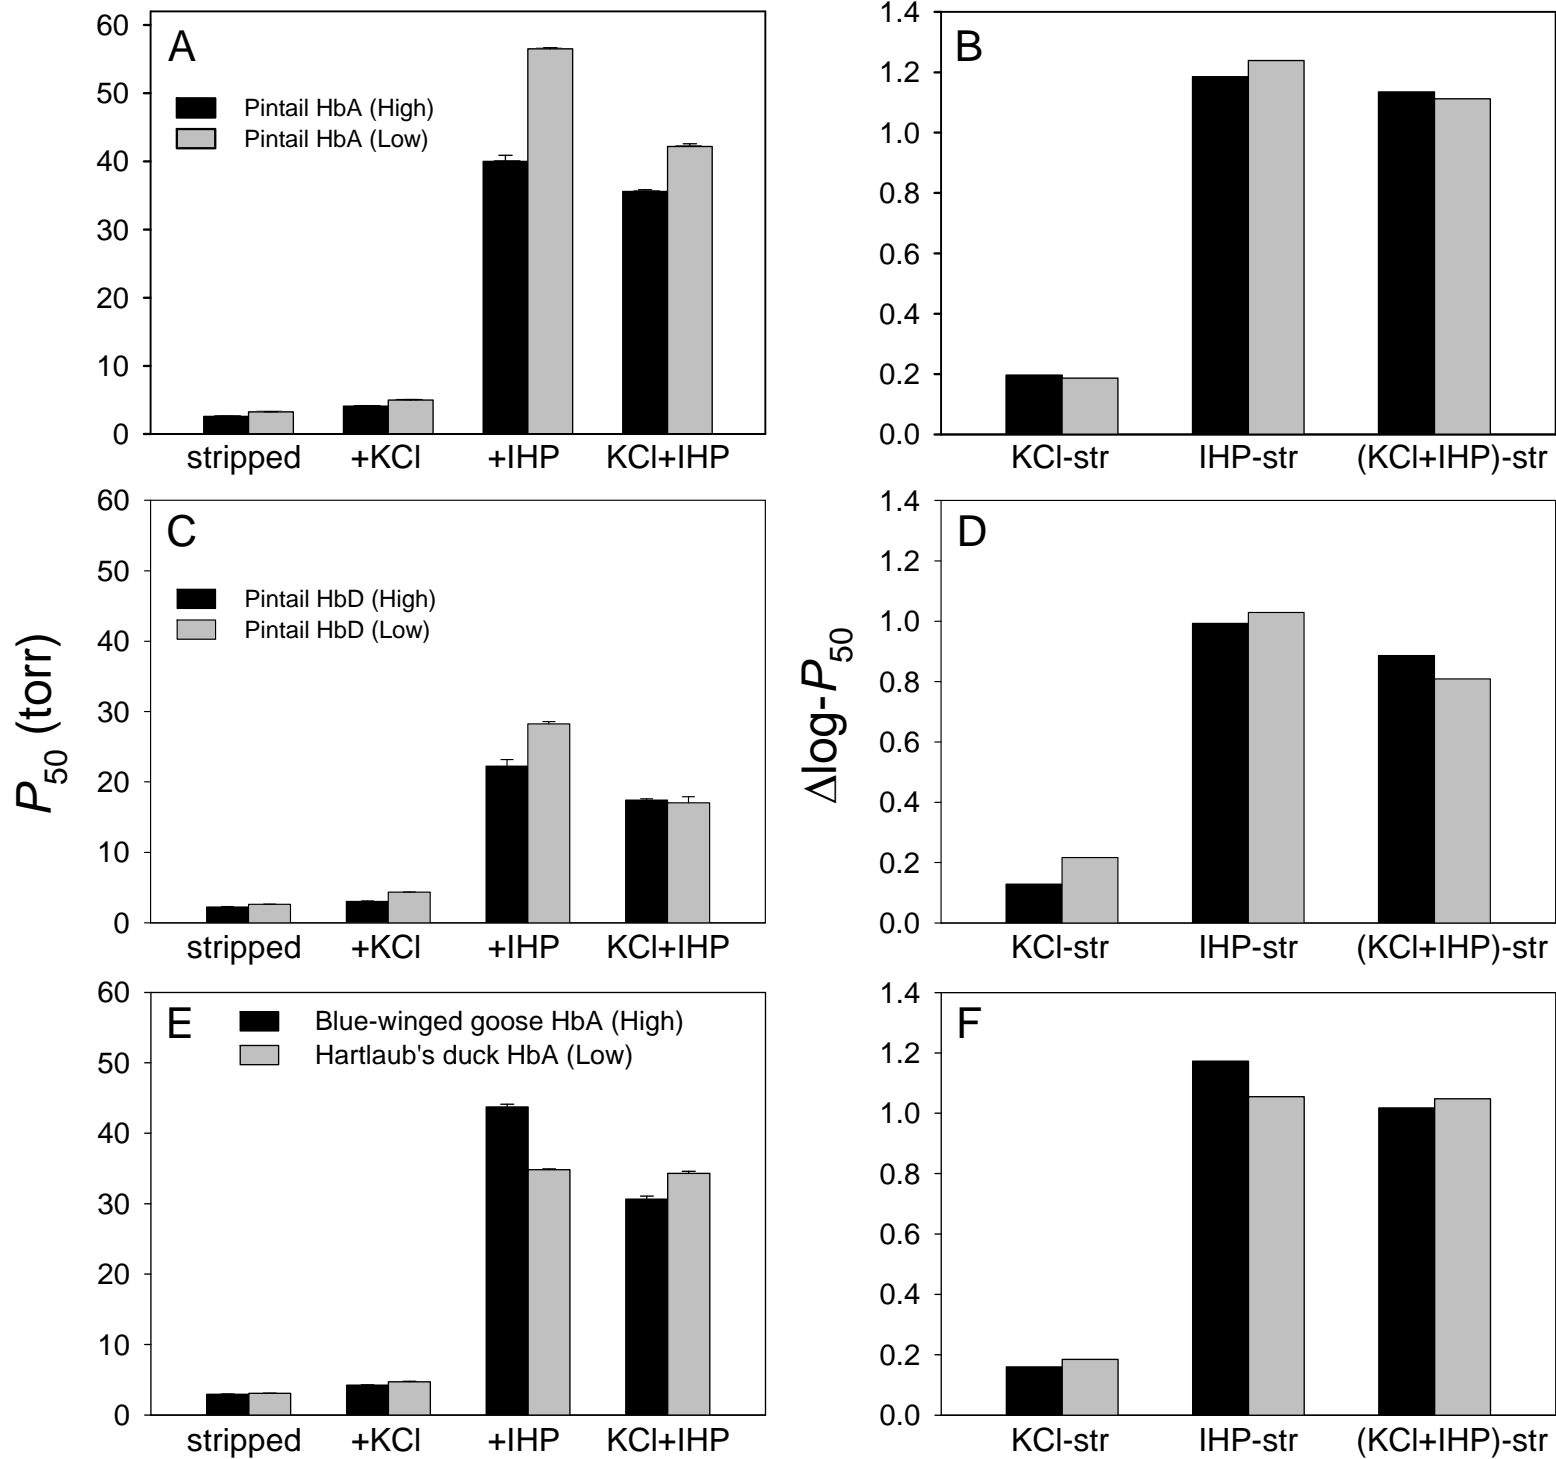

Supplement: pgen.1005681.s011.pdf [file pgen.1005681.s011.pdf]
