# Supplementary material for: Convergent Evolution of Hemoglobin Function in High-Altitude Andean Waterfowl Involves Limited Parallelism at the Molecular Sequence Level
Source: PLOS journal article supplement (doi:10.1371/journal.pgen.1005681), 2015-12-04
Supplement: S2 (10.1371/journal.pgen.1005681.s002) [file journal.pgen.1005681.s002.PDF]

αA

αA

αD

αD

βA

βA

|                              |                     |                                                                                                                                                                                                                                                                |
|------------------------------|---------------------|----------------------------------------------------------------------------------------------------------------------------------------------------------------------------------------------------------------------------------------------------------------|
| Consensus                    | 1102030405060708090 | VLSAXDKXXVKGXFSKIGGHAXXYGAEXLRFMFXYAPQTKTYFFPHFDLXHGSAQIKAHGKKVAAAALVAVNHIDDIXGALS <del>KL</del> SLDLHAQ <del>KL</del> RVDPVNF                                                                                                                                 |
| Ruddy_Duck_(High)            |                     | VLSA <del>A</del> DK <del>T</del> NVKGVFSKIGGHA <del>DD</del> YGAE <del>T</del> LERMF <del>V</del> AYPQTKTYFFPHFDLQHGS <del>A</del> QIKAHGKKVAAAALVEAVNHI <del>DD</del> <del>S</del> GA <del>L</del> SKLSDLHAQ <del>KL</del> RVDPVNF                           |
| Ruddy_Duck_(Low_1)           |                     | VLSA <del>A</del> DK <del>T</del> NVKGVFSKIGGHA <del>DD</del> YGAE <del>T</del> LERMF <del>V</del> AYPQTKTYFFPHFDLQHGS <del>A</del> QIKAHGKKVAAAALVEAVNHI <del>DD</del> <del>S</del> GA <del>L</del> SKLSDLHAQ <del>KL</del> RVDPVNF                           |
| Ruddy_Duck_(Low_2)           |                     | VLSA <del>A</del> DK <del>T</del> NVKGVFSKIGGHA <del>DD</del> YGAE <del>T</del> LERMF <del>V</del> AYPQTKTYFFPHFDLQHGS <del>A</del> QIKAHGKKVAAAALVEAVNHI <del>DD</del> <del>S</del> GA <del>L</del> SKLSDLHAQ <del>KL</del> RVDPVNF                           |
| Andean_Goose_(High)          |                     | VLSA <del>A</del> DK <del>A</del> NVKGVFSKIGGHA <del>DD</del> YGAE <del>T</del> LERMF <del>I</del> AYPQTKTYFFPHFDLH <del>H</del> GS <del>A</del> QIKAHGKKVAAAALVEAVNHI <del>DD</del> <del>I</del> <del>T</del> GA <del>L</del> SKLSDLHAQ <del>KL</del> RVDPVNF |
| Orinoco_Goose_(Low)          |                     | VLSA <del>A</del> DK <del>T</del> NVKGIFSKIGGHA <del>DD</del> YGAE <del>T</del> LERMF <del>I</del> AYPQTKTYFFPHFDLH <del>H</del> GS <del>A</del> QIKAHGKKVAAAALVEAVNHI <del>DD</del> <del>I</del> <del>T</del> GA <del>L</del> SKLSDLHAQ <del>KL</del> RVDPVNF |
| Torrent_Duck_(High)          |                     | VLSA <del>A</del> DK <del>T</del> NVKGVFSKIGGHA <del>DD</del> YGAE <del>T</del> LERMF <del>I</del> AYPQTKTYFFPHFDLQHGS <del>A</del> QIKAHGKKVAAAALVEAVNHI <del>DD</del> <del>I</del> <del>T</del> GA <del>L</del> SKLSDLHAQ <del>KL</del> RVDPVNF              |
| Torrent_Duck_(Low)           |                     | VLSA <del>A</del> DK <del>T</del> NVKGVFSKIGGHA <del>DD</del> YGAE <del>T</del> LERMF <del>I</del> AYPQTKTYFFPHFDLQHGS <del>A</del> QIKAHGKKVAAAALVEAVNHI <del>DD</del> <del>I</del> <del>T</del> GA <del>L</del> SKLSDLHAQ <del>KL</del> RVDPVNF              |
| Blue-winged_Goose_(High)     |                     | VLSA <del>A</del> DK <del>T</del> NVKGVFSKIGGHA <del>DD</del> YGAE <del>T</del> LERMF <del>I</del> AYPQTKTYFFPHFDLQHGS <del>A</del> QIKAHGKKVAAAALVEAVNHI <del>DD</del> <del>I</del> <del>T</del> GA <del>L</del> SKLSDLHAQ <del>KL</del> RVDPVNF              |
| Hartlaub's_Duck_(Low)        |                     | VLSA <del>A</del> DK <del>T</del> NVKGVFSKIGGHA <del>DD</del> YGAE <del>T</del> LERMF <del>I</del> AYPQTKTYFFPHFDLQHGS <del>A</del> QIKAHGKKVAAAALVEAVNHI <del>DD</del> <del>I</del> <del>T</del> GA <del>L</del> SKLSDLHAQ <del>KL</del> RVDPVNF              |
| Crested_Duck_(High)          |                     | VLSA <del>T</del> DK <del>T</del> NVKGVFSKIGGHA <del>EE</del> YGAE <del>T</del> LERMF <del>I</del> AYPQTKTYFFPHFDLQHGS <del>A</del> QIKAHGKKVAAAALVEAVNHI <del>DD</del> <del>I</del> <del>T</del> GA <del>L</del> SKLSDLHAQ <del>KL</del> RVDPVNF              |
| Crested_Duck_(Low)           |                     | VLSA <del>A</del> DK <del>T</del> NVKGVFSKIGGHA <del>EE</del> YGAE <del>T</del> LERMF <del>I</del> AYPQTKTYFFPHFDLQHGS <del>A</del> QIKAHGKKVAAAALVEAVNHI <del>DD</del> <del>I</del> <del>T</del> GA <del>L</del> SKLSDLHAQ <del>KL</del> RVDPVNF              |
| Cinnamon_Teal_(High)         |                     | VLSA <del>A</del> DK <del>T</del> SVKGVFSKIGGHA <del>EE</del> YGAE <del>A</del> LERMF <del>I</del> AYPQTKTYFFPHFDL <del>S</del> HGS <del>A</del> QIKAHGKKVAAAALVEAVNHI <del>DD</del> <del>I</del> <del>T</del> GA <del>L</del> SKLSDLHAQ <del>KL</del> RVDPVNF |
| Cinnamon_Teal_(Low)          |                     | VLSA <del>A</del> DK <del>T</del> NVKGVFSKIGGHA <del>EE</del> YGAE <del>A</del> LERMF <del>I</del> AYPQTKTYFFPHFDL <del>S</del> HGS <del>A</del> QIKAHGKKVAAAALVEAVNHI <del>DD</del> <del>I</del> <del>T</del> GA <del>L</del> SKLSDLHAQ <del>KL</del> RVDPVNF |
| Puna_Teal_(High)             |                     | VLSA <del>A</del> DK <del>T</del> NVKGVFSKIGGHA <del>EE</del> YGAE <del>T</del> LERMF <del>I</del> AYPQTKTYFFPHFDL <del>S</del> HGS <del>A</del> QIKAHGKKVAAAALVEAVNHI <del>DD</del> <del>I</del> <del>T</del> GA <del>L</del> SKLSDLHAQ <del>KL</del> RVDPVNF |
| Silver_Teal_(Low)            |                     | VLSA <del>A</del> DK <del>T</del> NVKGVFSKIGGHA <del>EE</del> YGAE <del>T</del> LERMF <del>I</del> AYPQTKTYFFPHFDL <del>S</del> HGS <del>A</del> QIKAHGKKVAAAALVEAVNHI <del>DD</del> <del>I</del> <del>T</del> GA <del>L</del> SKLSDLHAQ <del>KL</del> RVDPVNF |
| Yellow-billed_Pintail_(High) |                     | VLSA <del>A</del> DK <del>T</del> NVKGVFSKIGGHA <del>EE</del> YGAE <del>T</del> LERMF <del>I</del> AYPQTKTYFFPHFDL <del>S</del> HGS <del>A</del> QIKAHGKKVAAAALVEAVNHI <del>DD</del> <del>I</del> <del>T</del> GA <del>L</del> SKLSDLHAQ <del>KL</del> RVDPVNF |
| Yellow-billed_Pintail_(Low)  |                     | VLSA <del>A</del> DK <del>T</del> NVKGVFSKIGGHA <del>EE</del> YGAE <del>T</del> LERMF <del>I</del> AYPQTKTYFFPHFDL <del>S</del> HGS <del>A</del> QIKAHGKKVAAAALVEAVNHI <del>DD</del> <del>I</del> <del>T</del> GA <del>L</del> SKLSDLHAQ <del>KL</del> RVDPVNF |
| Speckled_Teal_(High_1)       |                     | VLSA <del>A</del> DK <del>T</del> NVKGVFSKIGGHA <del>EE</del> YGAE <del>T</del> LERMF <del>I</del> AYPQTKTYFFPHFDL <del>S</del> HGS <del>A</del> QIKAHGKKVAAAALVEAVNHI <del>DD</del> <del>I</del> <del>T</del> GA <del>L</del> SKLSDLHAQ <del>KL</del> RVDPVNF |
| Speckled_Teal_(High_2)       |                     | VLSA <del>A</del> DK <del>T</del> NVKGVFSKIGGHA <del>EE</del> YGAE <del>T</del> LERMF <del>I</del> AYPQTKTYFFPHFDL <del>S</del> HGS <del>A</del> QIKAHGKKVAAAALVEAVNHI <del>DD</del> <del>I</del> <del>T</del> GA <del>L</del> SKLSDLHAQ <del>KL</del> RVDPVNF |
| Speckled_Teal_(Low)          |                     | VLSA <del>A</del> DK <del>T</del> NVKGVFSKIGGHA <del>EE</del> YGAE <del>T</del> LERMF <del>I</del> AYPQTKTYFFPHFDL <del>S</del> HGS <del>A</del> QIKAHGKKVAAAALVEAVNHI <del>DD</del> <del>I</del> <del>T</del> GA <del>L</del> SKLSDLHAQ <del>KL</del> RVDPVNF |

|                              |                 |                                                                                                  |
|------------------------------|-----------------|--------------------------------------------------------------------------------------------------|
| Consensus                    | 100110120130141 | KFLGHCFLV <del>V</del> VAIHHPXAL <del>T</del> PEV <del>V</del> HASLDK <del>F</del> MCAVGAVLTAKYR |
| Ruddy_Duck_(High)            |                 | KFLGHCFLV <del>V</del> VAIHHP <del>S</del> ALTPEVHASLDK <del>F</del> MCAVGAVLTAKYR               |
| Ruddy_Duck_(Low_1)           |                 | KFLGHCFLV <del>V</del> VAIHHP <del>S</del> ALTPEVHASLDK <del>F</del> MCAVGAVLTAKYR               |
| Ruddy_Duck_(Low_2)           |                 | KFLGHCFLV <del>V</del> VAIHHP <del>S</del> ALTPEVHASLDK <del>F</del> MCAVGAVLTAKYR               |
| Andean_Goose_(High)          |                 | KFLGHCFLV <del>V</del> VAIHHP <del>A</del> ALTPEVHASLDK <del>F</del> MCAVGAVLTAKYR               |
| Orinoco_Goose_(Low)          |                 | KFLGHCFLV <del>V</del> VAIHHP <del>A</del> ALTPEVHASLDK <del>F</del> MCAVGAVLTAKYR               |
| Torrent_Duck_(High)          |                 | KFLGHCFLV <del>V</del> VAIHHP <del>A</del> ALTPEVHASLDK <del>F</del> MCAVGAVLTAKYR               |
| Torrent_Duck_(Low)           |                 | KFLGHCFLV <del>V</del> VAIHHP <del>A</del> ALTPEVHASLDK <del>F</del> MCAVGAVLTAKYR               |
| Blue-winged_Goose_(High)     |                 | KFLGHCFLV <del>V</del> VAIHHP <del>A</del> ALTPEVHASLDK <del>F</del> MCAVGAVLTAKYR               |
| Hartlaub's_Duck_(Low)        |                 | KFLGHCFLV <del>V</del> VAIHHP <del>A</del> ALTPEVHASLDK <del>F</del> MCAVGAVLTAKYR               |
| Crested_Duck_(High)          |                 | KFLGHCFLV <del>V</del> VAIHHP <del>A</del> ALTPEVHASLDK <del>F</del> MCAVGAVLTAKYR               |
| Crested_Duck_(Low)           |                 | KFLGHCFLV <del>V</del> VAIHHP <del>A</del> ALTPEVHASLDK <del>F</del> MCAVGAVLTAKYR               |
| Cinnamon_Teal_(High)         |                 | KFLGHCFLV <del>V</del> VAIHHP <del>A</del> ALTPEVHASLDK <del>F</del> MCAVGAVLTAKYR               |
| Cinnamon_Teal_(Low)          |                 | KFLGHCFLV <del>V</del> VAIHHP <del>A</del> ALTPEVHASLDK <del>F</del> MCAVGAVLTAKYR               |
| Puna_Teal_(High)             |                 | KFLGHCFLV <del>V</del> VAIHHP <del>A</del> ALTPEVHASLDK <del>F</del> MCAVGAVLTAKYR               |
| Silver_Teal_(Low)            |                 | KFLGHCFLV <del>V</del> VAIHHP <del>A</del> ALTPEVHASLDK <del>F</del> MCAVGAVLTAKYR               |
| Yellow-billed_Pintail_(High) |                 | KFLGHCFLV <del>V</del> VAIHHP <del>A</del> ALTPEVHASLDK <del>F</del> MCAVGAVLTAKYR               |
| Yellow-billed_Pintail_(Low)  |                 | KFLGHCFLV <del>V</del> VAIHHP <del>A</del> ALTPEVHASLDK <del>F</del> MCAVGAVLTAKYR               |
| Speckled_Teal_(High_1)       |                 | KFLGHCFLV <del>V</del> VAIHHP <del>A</del> ALTPEVHASLDK <del>F</del> MCAVGAVLTAKYR               |
| Speckled_Teal_(High_2)       |                 | KFLGHCFLV <del>V</del> VAIHHP <del>A</del> ALTPEVHASLDK <del>F</del> MCAVGAVLTAKYR               |
| Speckled_Teal_(Low)          |                 | KFLGHCFLV <del>V</del> VAIHHP <del>A</del> ALTPEVHASLDK <del>F</del> MCAVGAVLTAKYR               |

|                              |                     |                                                                                                                                                                                                                                       |
|------------------------------|---------------------|---------------------------------------------------------------------------------------------------------------------------------------------------------------------------------------------------------------------------------------|
| Consensus                    | 1102030405060708090 | MLTAXDKKXJXQLWEK <del>V</del> AGHQX <del>E</del> FGX <del>E</del> ALQRMFJXY <del>P</del> QTKTYFFPHFDLX <del>P</del> GS <del>E</del> QXRGHGKKVAAAALGN <del>A</del> VKSLDNLSQALS <del>E</del> LSNLHAYNLRVDPXN <del>F</del>              |
| Ruddy_Duck_(High)            |                     | MLTA <del>D</del> DKKHIVQLWEK <del>V</del> AGHQ <del>E</del> FGN <del>E</del> ALQRMFI <del>T</del> YPQTKTYFFPHFDLHPGSEQ <del>I</del> RGHGKKVAAAALGN <del>A</del> VKSLDNLSQALS <del>E</del> LSNLHAYNLRVDPAN <del>F</del>               |
| Ruddy_Duck_(Low)             |                     | MLTA <del>D</del> DKKHIVQLWEK <del>V</del> AGHQ <del>E</del> FGN <del>E</del> ALQRMFI <del>T</del> YPQTKTYFFPHFDLHPGSEQ <del>I</del> RGHGKKVAAAALGN <del>A</del> VKSLDNLSQALS <del>E</del> LSNLHAYNLRVDPAN <del>F</del>               |
| Andean_goose_(High)          |                     | MLTA <del>D</del> DKKLLTQLWEK <del>V</del> AGHQ <del>E</del> FGS <del>E</del> ALQRMFI <del>L</del> TPQTKTYFFPHFDLHPGSEQ <del>V</del> RGHGKKVAAAALGN <del>A</del> VKSLDNLSQALS <del>E</del> LSNLHAYNLRVDPAN <del>F</del>               |
| Orinoco_goose(Low)           |                     | MLTA <del>D</del> DKKLLITQLWEK <del>V</del> AGHQ <del>E</del> FGS <del>E</del> ALQRMFI <del>L</del> TPQTKTYFFPHFDLHPGSEQ <del>V</del> RGHGKKVAAAALGN <del>A</del> VKSLDNLSQALS <del>E</del> LSNLHAYNLRVDPAN <del>F</del>              |
| Torrent_Duck_(High)          |                     | MLTA <del>D</del> DKKLLITQLWEK <del>V</del> AGHQ <del>E</del> FGS <del>E</del> ALQRMFI <del>L</del> TPQTKTYFFPHFDL <del>N</del> PGSEQ <del>V</del> RGHGKKVAAAALGN <del>A</del> VKSLDNLSQALS <del>E</del> LSNLHAYNLRVDPAN <del>F</del> |
| Torrent_Duck_(Low)           |                     | MLTA <del>D</del> DKKLLITQLWEK <del>V</del> AGHQ <del>E</del> FGS <del>E</del> ALQRMFI <del>L</del> TPQTKTYFFPHFDL <del>N</del> PGSEQ <del>V</del> RGHGKKVAAAALGN <del>A</del> VKSLDNLSQALS <del>E</del> LSNLHAYNLRVDPAN <del>F</del> |
| Blue-winged_Goose_(High)     |                     | MLTA <del>E</del> DKKLLIAQLWEK <del>V</del> AGHQ <del>E</del> FGS <del>E</del> ALQRMFI <del>T</del> YPQTKTYFFPHFDLHPGSEQ <del>V</del> RGHGKKVAAAALGN <del>A</del> VKSLDNLSQALS <del>E</del> LSNLHAYNLRVDPAN <del>F</del>              |
| Hartlaub's_Duck_(Low)        |                     | MLTA <del>E</del> DKKLLIVQLWEK <del>V</del> AGHQ <del>D</del> FGS <del>E</del> ALQRMFI <del>L</del> TPQTKTYFFPHFDLHPGSEQ <del>V</del> RGHGKKVAAAALGN <del>A</del> VKSLDNLSQALS <del>E</del> LSNLHAYNLRVDPV <del>N</del> F             |
| Crested_Duck_(High)          |                     | MLTA <del>E</del> DKKLLITQLWEK <del>V</del> AGHQ <del>E</del> FGS <del>E</del> ALQRMFI <del>L</del> AYPQTKTYFFPHFDLHPGSEQ <del>V</del> RGHGKKVAAAALGN <del>A</del> VKSLDNLSQALS <del>E</del> LSNLHAYNLRVDPV <del>N</del> F            |
| Crested_Duck_(Low)           |                     | MLTA <del>E</del> DKKLLITQLWEK <del>V</del> AGHQ <del>E</del> FGS <del>E</del> ALQRMFI <del>L</del> AYPQTKTYFFPHFDLHPGSEQ <del>V</del> RGHGKKVAAAALGN <del>A</del> VKSLDNLSQALS <del>E</del> LSNLHAYNLRVDPV <del>N</del> F            |
| Cinnamon_Teal_(High)         |                     | MLTA <del>E</del> DKKLLITQLWEK <del>V</del> AGHQ <del>E</del> FGS <del>E</del> ALQRMFI <del>L</del> AYPQTKTYFFPHFDLHPGSEQ <del>V</del> RGHGKKVAAAALGN <del>A</del> VKSLDNLSQALS <del>E</del> LSNLHAYNLRVDPV <del>N</del> F            |
| Cinnamon_Teal_(Low)          |                     | MLTA <del>E</del> DKKLLITQLWEK <del>V</del> AGHQ <del>E</del> FGS <del>E</del> ALQRMFI <del>L</del> AYPQTKTYFFPHFDLHPGSEQ <del>V</del> RGHGKKVAAAALGN <del>A</del> VKSLDNLSQALS <del>E</del> LSNLHAYNLRVDPV <del>N</del> F            |
| Puna_Teal_(High)             |                     | MLTA <del>E</del> DKKLLITQLWEK <del>V</del> AGHQ <del>E</del> FGS <del>E</del> ALQRMFI <del>L</del> AYPQTKTYFFPHFDLHPGSEQ <del>V</del> RGHGKKVAAAALGN <del>A</del> VKSLDNLSQALS <del>E</del> LSNLHAYNLRVDPV <del>N</del> F            |
| Silver_Teal_(Low)            |                     | MLTA <del>E</del> DKKLLITQLWEK <del>V</del> AGHQ <del>E</del> FGS <del>E</del> ALQRMFI <del>L</del> AYPQTKTYFFPHFDLHPGSEQ <del>V</del> RGHGKKVAAAALGN <del>A</del> VKSLDNLSQALS <del>E</del> LSNLHAYNLRVDPV <del>N</del> F            |
| Yellow-billed_Pintail_(High) |                     | MLTA <del>E</del> DKKLLITQLWEK <del>V</del> AGHQ <del>E</del> FGS <del>E</del> ALQRMFI <del>L</del> AYPQTKTYFFPHFDLHPGSEQ <del>V</del> RGHGKKVAAAALGN <del>A</del> VKSLDNLSQALS <del>E</del> LSNLHAYNLRVDPV <del>N</del> F            |
| Yellow-billed_Pintail_(Low)  |                     | MLTA <del>E</del> DKKLLITQLWEK <del>V</del> AGHQ <del>E</del> FGS <del>E</del> ALQRMFI <del>L</del> AYPQTKTYFFPHFDLHPGSEQ <del>V</del> RGHGKKVAAAALGN <del>A</del> VKSLDNLSQALS <del>E</del> LSNLHAYNLRVDPV <del>N</del> F            |
| Speckled_Teal_(High)         |                     | MLTA <del>E</del> DKKLLITQLWEK <del>V</del> AGHQ <del>E</del> FGS <del>E</del> ALQRMFI <del>L</del> AYPQTKTYFFPHFDLHPGSEQ <del>V</del> RGHGKKVAAAALGN <del>A</del> VKSLDNLSQALS <del>E</del> LSNLHAYNLRVDPV <del>N</del> F            |
| Speckled_Teal_(Low)          |                     | MLTA <del>E</del> DKKLLITQLWEK <del>V</del> AGHQ <del>E</del> FGS <del>E</del> ALQRMFI <del>L</del> AYPQTKTYFFPHFDLHPGSEQ <del>V</del> RGHGKKVAAAALGN <del>A</del> VKSLDNLSQALS <del>E</del> LSNLHAYNLRVDPV <del>N</del> F            |

|                              |                 |                                                                                                                             |
|------------------------------|-----------------|-----------------------------------------------------------------------------------------------------------------------------|
| Consensus                    | 100110120130141 | KLLAQCFQV <del>V</del> LA <del>A</del> HLGKDYSPEM <del>H</del> AAFDK <del>F</del> LSAVA <del>A</del> AVLAEKYR               |
| Ruddy_Duck_(High)            |                 | KLLAQCFQV <del>V</del> LA <del>A</del> HLGKDYSPEM <del>H</del> AAFDK <del>F</del> LSAVA <del>A</del> AVLAEKYR               |
| Ruddy_Duck_(Low)             |                 | KLLAQCFQV <del>V</del> LA <del>A</del> HLGKDYSPEM <del>H</del> AAFDK <del>F</del> LSAVA <del>A</del> AVLAEKYR               |
| Andean_goose_(High)          |                 | KLLAQCFQV <del>V</del> LA <del>T</del> HLGKDYSPEM <del>H</del> AAFDK <del>F</del> LSAVA <del>A</del> AVLAEKYR               |
| Orinoco_goose(Low)           |                 | KLLAQCFQV <del>V</del> LA <del>T</del> HLGKDYSPEM <del>H</del> AAFDK <del>F</del> LSAVA <del>A</del> AVLAEKYR               |
| Torrent_Duck_(High)          |                 | KLLAQCFQV <del>V</del> LA <del>T</del> HLGKDYSPEM <del>H</del> AAFDK <del>F</del> LSAVA <del>A</del> AVLAEKYR               |
| Torrent_Duck_(Low)           |                 | KLLAQCFQV <del>V</del> LA <del>T</del> HLGKDYSPEM <del>H</del> AAFDK <del>F</del> LSAVA <del>A</del> AVLAEKYR               |
| Blue-winged_Goose_(High)     |                 | KLLAQCFQV <del>V</del> LA <del>A</del> HLGKDYSPE <del>D</del> M <del>H</del> AAFDK <del>F</del> LSAVA <del>A</del> AVLAEKYR |
| Hartlaub's_Duck_(Low)        |                 | KLLAQCFQV <del>V</del> LA <del>A</del> HLGKDYSPEM <del>H</del> AAFDK <del>F</del> LSAVA <del>A</del> AVLAEKYR               |
| Crested_Duck_(High)          |                 | KLLAQCFQV <del>V</del> LA <del>A</del> HM <del>G</del> KDYSPEM <del>H</del> AAFDK <del>F</del> MSAVA <del>A</del> AVLAEKYR  |
| Crested_Duck_(Low)           |                 | KLLAQCFQV <del>V</del> LA <del>A</del> HM <del>G</del> KDYSPEM <del>H</del> AAFDK <del>F</del> MSAVA <del>A</del> AVLAEKYR  |
| Cinnamon_Teal_(High)         |                 | KLLAQCFQV <del>V</del> LA <del>A</del> HLGKDYSPEM <del>H</del> AAFDK <del>F</del> MSAVA <del>A</del> AVLAEKYR               |
| Cinnamon_Teal_(Low)          |                 | KLLAQCFQV <del>V</del> LA <del>A</del> HLGKDYSPEM <del>H</del> AAFDK <del>F</del> MSAVA <del>A</del> AVLAEKYR               |
| Puna_Teal_(High)             |                 | KLLAQCFQV <del>V</del> LA <del>A</del> HLGKDYSPEM <del>H</del> AAFDK <del>F</del> MSAVA <del>A</del> AVLAEKYR               |
| Silver_Teal_(Low)            |                 | KLLAQCFQV <del>V</del> LA <del>A</del> HLGKDYSPEM <del>H</del> AAFDK <del>F</del> MSAVA <del>A</del> AVLAEKYR               |
| Yellow-billed_Pintail_(High) |                 | KLLAQCFQV <del>V</del> LA <del>A</del> HLGKDYSPEM <del>H</del> AAFDK <del>F</del> MSAVA <del>A</del> AVLAEKYR               |
| Yellow-billed_Pintail_(Low)  |                 | KLLAQCFQV <del>V</del> LA <del>A</del> HLGKDYSPEM <del>H</del> AAFDK <del>F</del> MSAVA <del>A</del> AVLAEKYR               |
| Speckled_Teal_(High)         |                 | KLLAQCFQV <del>V</del> LA <del>A</del> HLGKDYSPEM <del>H</del> AAFDK <del>F</del> MFAVA <del>A</del> AVLAEKYR               |
| Speckled_Teal_(Low)          |                 | KLLAQCFQV <del>V</del> LA <del>A</del> HLGKDYSPEM <del>H</del> AAFDK <del>F</del> MSAVA <del>A</del> AVLAEKYR               |

|                              |                     |                                                                                                                                                                                                                                       |
|------------------------------|---------------------|---------------------------------------------------------------------------------------------------------------------------------------------------------------------------------------------------------------------------------------|
| Consensus                    | 1102030405060708090 | VHWXAA <del>E</del> EKQLITXJWGK <del>V</del> NVADCGA <del>E</del> ALARLLIVYPWTQRFFXSFGNLS <del>S</del> XTAIXGNPMVRXH <del>G</del> KKVLX <del>S</del> FGDAVKNLDN <del>I</del> KN <del>T</del> FXQL <del>S</del> ELHCKX <del>L</del> HV |
| Ruddy_Duck_(High)            |                     | VHW <del>T</del> ABEEKQLITGLWGK <del>V</del> NVADCGA <del>E</del> ALARLLIVYPWTQRFF <del>S</del> SGNLS <del>S</del> PTAILGNPMVRAHGKKVL <del>S</del> SGDAVKNLDN <del>I</del> KN <del>T</del> FAQLSELHCDK <del>L</del> HV                |
| Ruddy_Duck_(Low_1)           |                     | VHW <del>T</del> ABEEKQLIT <del>S</del> IWGK <del>V</del> NVADCGA <del>E</del> ALARLLIVYPWTQRFF <del>S</del> SGNLS <del>S</del> PTAILGNPMVRAHGKKVL <del>S</del> SGDAVKNLDN <del>I</del> KN <del>T</del> FAQLSELHCDK <del>L</del> HV   |
| Ruddy_Duck_(Low_2)           |                     | VHW <del>T</del> ABEEKQLITGLWGK <del>V</del> NVADCGA <del>E</del> ALARLLIVYPWTQRFF <del>S</del> SGNLS <del>S</del> PTAILGNPMVRAHGKKVL <del>S</del> SGDAVKNLDN <del>I</del> KN <del>T</del> FAQLSELHCDK <del>L</del> HV                |
| Andean_Goose(High)           |                     | VHW <del>T</del> ABEEKQLITGLWGK <del>V</del> NVADCGA <del>E</del> ALARLLIVYPWTQRFF <del>S</del> SGNLS <del>S</del> PTAISGNPMVRAHGKKVL <del>S</del> SGDAVKNLDN <del>I</del> KN <del>T</del> FAQLSELHCDK <del>L</del> HV                |
| Orinoco_Goose(Low)           |                     | VHW <del>T</del> ABEEKQLITGLWGK <del>V</del> NVADCGA <del>E</del> ALARLLIVYPWTQRFF <del>S</del> SGNLS <del>S</del> PTAILGNPMVRAHGKKVL <del>S</del> SGDAVKNLDN <del>I</del> KN <del>T</del> FAQLSELHCDK <del>L</del> HV                |
| Torrent_Duck(High)           |                     | VHW <del>T</del> ABEEKQLITGLWGK <del>V</del> NVADCGA <del>E</del> ALARLLIVYPWTQRFF <del>S</del> SGNLS <del>S</del> PTAILGNPMVR <del>T</del> HGKKVL <del>S</del> SGDAVKNLDN <del>I</del> KN <del>T</del> FAQLSELHCDK <del>L</del> HV   |
| Torrent_Duck(Low)            |                     | VHW <del>T</del> ABEEKQLITGLWGK <del>V</del> NVADCGA <del>E</del> ALARLLIVYPWTQRFF <del>S</del> SGNLS <del>S</del> PTAILGNPMVR <del>T</del> HGKKVL <del>S</del> SGDAVKNLDN <del>I</del> KN <del>T</del> FAQLSELHCDK <del>L</del> HV   |
| Blue-winged_Goose_(High)     |                     | VHW <del>T</del> ABEEKQLITGLWGK <del>V</del> NVADCGA <del>E</del> ALARLLIVYPWTQRFF <del>S</del> SGNLS <del>S</del> PTAILGNPMVRAHGKKVL <del>S</del> SGDAVKNLDN <del>I</del> KN <del>T</del> FAQLSELHCDK <del>L</del> HV                |
| Hartlaub's_Duck(Low)         |                     | VHW <del>T</del> ABEEKQLITGLWGK <del>V</del> NVADCGA <del>E</del> ALARLLIVYPWTQRFF <del>S</del> SGNLS <del>S</del> PTAILGNPMVRAHGKKVL <del>S</del> SGDAVKNLDN <del>I</del> KN <del>T</del> FAQLSELHCDK <del>L</del> HV                |
| Crested_Duck_(High)          |                     | VHW <del>S</del> ABEEKQLITGLWGK <del>V</del> NVADCGA <del>E</del> ALARLLIVYPWTQRFF <del>S</del> SGNLS <del>S</del> PTAILGNPMVRAHGKKVL <del>S</del> SGDAVKNLDN <del>I</del> KN <del>T</del> FAQLSELHCDK <del>L</del> HV                |
| Crested_Duck_(Low)           |                     | VHW <del>S</del> ABEEKQLITGLWGK <del>V</del> NVADCGA <del>E</del> ALARLLIVYPWTQRFF <del>S</del> SGNLS <del>S</del> PTAILGNPMVRAHGKKVL <del>S</del> SGDAVKNLDN <del>I</del> KN <del>T</del> FAQLSELHCDK <del>L</del> HV                |
| Cinnamon_Teal_(High)         |                     | VHW <del>T</del> ABEEKQLITGLWGK <del>V</del> NVADCGA <del>E</del> ALARLLIVYPWTQRFF <del>S</del> SGNLS <del>S</del> ATAITGNPMVRAHGKKVL <del>S</del> SGDAVKNLDN <del>I</del> KN <del>T</del> FAQLSELHCDK <del>L</del> HV                |
| Cinnamon_Teal_(Low)          |                     | VHW <del>T</del> ABEEKQLITGLWGK <del>V</del> NVADCGA <del>E</del> ALARLLIVYPWTQRFF <del>S</del> SGNLS <del>S</del> ATAITGNPMVRAHGKKVL <del>S</del> SGDAVKNLDN <del>I</del> KN <del>T</del> FAQLSELHCDK <del>L</del> HV                |
| Puna_Teal_(High)             |                     | VHW <del>T</del> ABEEKQLITGLWGK <del>V</del> NVADCGA <del>E</del> ALARLLIVYPWTQRFF <del>S</del> SGNLS <del>S</del> ATAITGNPMVRAHGKKVL <del>S</del> SGDAVKNLDN <del>I</del> KN <del>T</del> FAQLSELHCDK <del>L</del> HV                |
| Silver_Teal_(Low)            |                     | VHW <del>T</del> ABEEKQLITGLWGK <del>V</del> NVADCGA <del>E</del> ALARLLIVYPWTQRFF <del>S</del> SGNLS <del>S</del> ATAITGNPMVRAHGKKVL <del>S</del> SGDAVKNLDN <del>I</del> KN <del>T</del> FAQLSELHCDK <del>L</del> HV                |
| Yellow-billed_Pintail_(High) |                     | VHW <del>T</del> ABEEKQLITGLWGK <del>V</del> NVADCGA <del>E</del> ALARLLIVYPWTQRFF <del>S</del> SGNLS <del>S</del> PTAILGNPMVRAHGKKVL <del>S</del> SGDAVKNLDN <del>I</del> KN <del>T</del> FAQLSELHCDK <del>L</del> HV                |
| Yellow-billed_Pintail_(Low)  |                     | VHW <del>T</del> ABEEKQLITGLWGK <del>V</del> NVADCGA <del>E</del> ALARLLIVYPWTQRFF <del>S</del> SGNLS <del>S</del> PTAILGNPMVRAHGKKVL <del>S</del> SGDAVKNLDN <del>I</del> KN <del>T</del> FAQLSELHCDK <del>L</del> HV                |
| Speckled_Teal_(High_1)       |                     | VHW <del>T</del> ABEEKQLIT <del>S</del> LWGK <del>V</del> NVADCGA <del>E</del> ALARLLIVYPWTQRFF <del>S</del> SGNLS <del>S</del> PTAILGNPMVRAHGKKVL <del>S</del> SGDAVKNLDN <del>I</del> KN <del>T</del> FAQLSELHCDK <del>L</del> HV   |
| Speckled_Teal_(High_2)       |                     | VHW <del>T</del> ABEEKQLITGLWGK <del>V</del> NVADCGA <del>E</del> ALARLLIVYPWTQRFF <del>S</del> SGNLS <del>S</del> PTAILGNPMVRAHGKKVL <del>S</del> SGDAVKNLDN <del>I</del> KN <del>T</del> FAQLSELHCDK <del>L</del> HV                |
| Speckled_Teal_(Low)          |                     | VHW <del>T</del> ABEEKQLITGLWGK <del>V</del> NVADCGA <del>E</del> ALARLLIVYPWTQRFF <del>S</del> SGNLS <del>S</del> PTAILGNPMVRAHGKKVL <del>S</del> SGDAVKNLDN <del>I</del> KN <del>T</del> FAQLSELHCDK <del>L</del> HV                |

|                              |   |   |   |   |   |   |   |   |   |   |   |   |   |   |   |   |   |   |   |   |   |   |   |   |   |   |   |   |   |   |   |   |   |   |   |   |   |   |   |   |   |   |   |   |   |   |   |
|------------------------------|---|---|---|---|---|---|---|---|---|---|---|---|---|---|---|---|---|---|---|---|---|---|---|---|---|---|---|---|---|---|---|---|---|---|---|---|---|---|---|---|---|---|---|---|---|---|---|
| Consensus                    | D | P | E | N | F | R | L | L | G | D | I | L | I | V | L | A | H | F | S | K | D | F | T | P | D | C | Q | A | A | W | Q | K | L | V | R | V | V | A | H | A | L | A | R | K | Y | H |   |
| Ruddy_Duck_(High)            | D | P | E | N | F | R | L | L | G | D | I | L | I | V | L | A | A | H | F | S | K | D | F | T | P | D | C | Q | A | A | W | Q | K | L | V | R | V | V | A | H | A | L | A | R | K | Y | H |
| Ruddy_Duck_(Low_1)           | D | P | E | N | F | R | L | L | G | D | I | L | I | V | L | A | A | H | F | S | K | D | F | T | P | D | C | Q | A | A | W | Q | K | L | V | R | V | V | A | H | A | L | A | R | K | Y | H |
| Ruddy_Duck_(Low_2)           | D | P | E | N | F | R | L | L | G | D | I | L | I | V | L | A | A | H | F | S | K | D | F | T | P | D | C | Q | A | A | W | Q | K | L | V | R | V | V | A | H | A | L | A | R | K | Y | H |
| Andean_Goose(High)           | D | P | E | N | F | R | L | L | G | D | I | L | I | V | L | A | A | H | F | T | K | D | F | T | P | D | C | Q | A | A | W | Q | K | L | V | R | V | V | A | H | A | L | A | R | K | Y | H |
| Orinoco_Goose(Low)           | D | P | E | N | F | R | L | L | G | D | I | L | I | V | L | A | A | H | F | T | K | D | F | T | P | D | C | Q | A | A | W | Q | K | L | V | R | V | V | A | H | A | L | A | R | K | Y | H |
| Torrent_Duck(High)           | D | P | E | N | F | R | L | L | G | D | I | L | I | V | L | A | A | H | F | S | K | D | F | T | P | D | C | Q | A | A | W | Q | K | L | V | R | V | V | A | H | A | L | A | R | K | Y | H |
| Torrent_Duck(Low)            | D | P | E | N | F | R | L | L | G | D | I | L | I | V | L | A | A | H | F | S | K | D | F | T | P | D | C | Q | A | A | W | Q | K | L | V | R | V | V | A | H | A | L | A | R | K | Y | H |
| Blue-winged_Goose_(High)     | D | P | E | N | F | R | L | L | G | D | I | L | I | V | L | A | S | H | F | T | K | D | F | T | P | D | C | Q | A | A | W | Q | K | L | V | R | V | V | A | H | A | L | A | R | K | Y | H |
| Hartlaub's_Duck(Low)         | D | P | E | N | F | R | L | L | G | D | I | L | I | V | L | A | A | H | F | T | K | D | F | T | P | D | C | Q | A | A | W | Q | K | L | V | R | V | V | A | H | A | L | A | R | K | Y | H |
| Crested_Duck_(High)          | D | P | E | N | F | R | L | L | G | D | I | L | I | V | L | A | A | H | F | T | K | D | F | T | P | E | C | Q | A | A | W | Q | K | L | V | R | V | V | A | H | A | L | A | R | K | Y | H |
| Crested_Duck_(Low)           | D | P | E | N | F | R | L | L | G | D | I | L | I | V | L | A | A | H | F | T | K | D | F | T | P | E | C | Q | A | A | W | Q | K | L | V | R | V | V | A | H | A | L | A | R | K | Y | H |
| Cinnamon_Teal_(High)         | D | P | E | N | F | R | L | L | G | D | I | L | I | V | L | A | A | H | F | T | K | D | F | T | P | E | C | Q | A | A | W | Q | K | L | V | R | V | V | A | H | A | L | A | R | K | Y | H |
| Cinnamon_Teal_(Low)          | D | P | E | N | F | R | L | L | G | D | I | L | I | V | L | A | A | H | F | T | K | D | F | T | P | E | C | Q | A | A | W | Q | K | L | V | R | V | V | A | H | A | L | A | R | K | Y | H |
| Puna_Teal_(High)             | D | P | E | N | F | R | L | L | G | D | I | L | I | V | L | A | A | H | F | T | K | D | F | T | P | E | C | Q | A | A | W | Q | K | L | V | R | V | V | A | H | A | L | A | R | K | Y | H |
| Silver_Teal_(Low)            | D | P | E | N | F | R | L | L | G | D | I | L | I | V | L | A | A | H | F | T | K | D | F | T | P | E | C | Q | A | A | W | Q | K | L | V | R | V | V | A | H | A | L | A | R | K | Y | H |
| Yellow-billed_Pintail_(High) | D | P | E | N | F | R | L | L | G | D | I | L | I | V | L | A | S | H | F | T | K | D | F | T | P | E | C | Q | A | A | W | Q | K | M | V | R | V | V | A | H | A | L | A | R | K | Y | H |
| Yellow-billed_Pintail_(Low)  | D | P | E | N | F | R | L | L | G | D | I | L | I | V | L | A | A | H | F | T | K | D | F | T | P | E | C | Q | A | A | W | Q | K | L | V | R | V | V | A | H | A | L | A | R | K | Y | H |
| Speckled_Teal_(High_1)       | D | P | E | N | F | R | L | L | G | D | I | L | I | V | L | A | S | H | F | T | K | D | F | T | P | E | C | Q | A | A | W | Q | K | M | V | R | V | V | A | H | A | L | A | R | K | Y | H |
| Speckled_Teal_(High_2)       | D | P | E | N | F | R | L | L | G | D | I | L | I | V | L | A | S | H | F | T | K | D | F | T | P | E | C | Q | A | A | W | Q | K | M | V | R | V | V | A | H | A | L | A | R | K | Y | H |
| Speckled_Teal_(Low)          | D | P | E | N | F | R | L | L | G | D | I | L | I | V | L | A | A | H | F | T | K | D | F | T | P | E | C | Q | A | A | W | Q | K | L | V | R | V | V | A | H | A | L | A | R | K | Y | H |
