# Supplementary material for: Convergent Evolution of Hemoglobin Function in High-Altitude Andean Waterfowl Involves Limited Parallelism at the Molecular Sequence Level
Source: PLOS journal article supplement (doi:10.1371/journal.pgen.1005681), 2015-12-04

0000

00017

58937

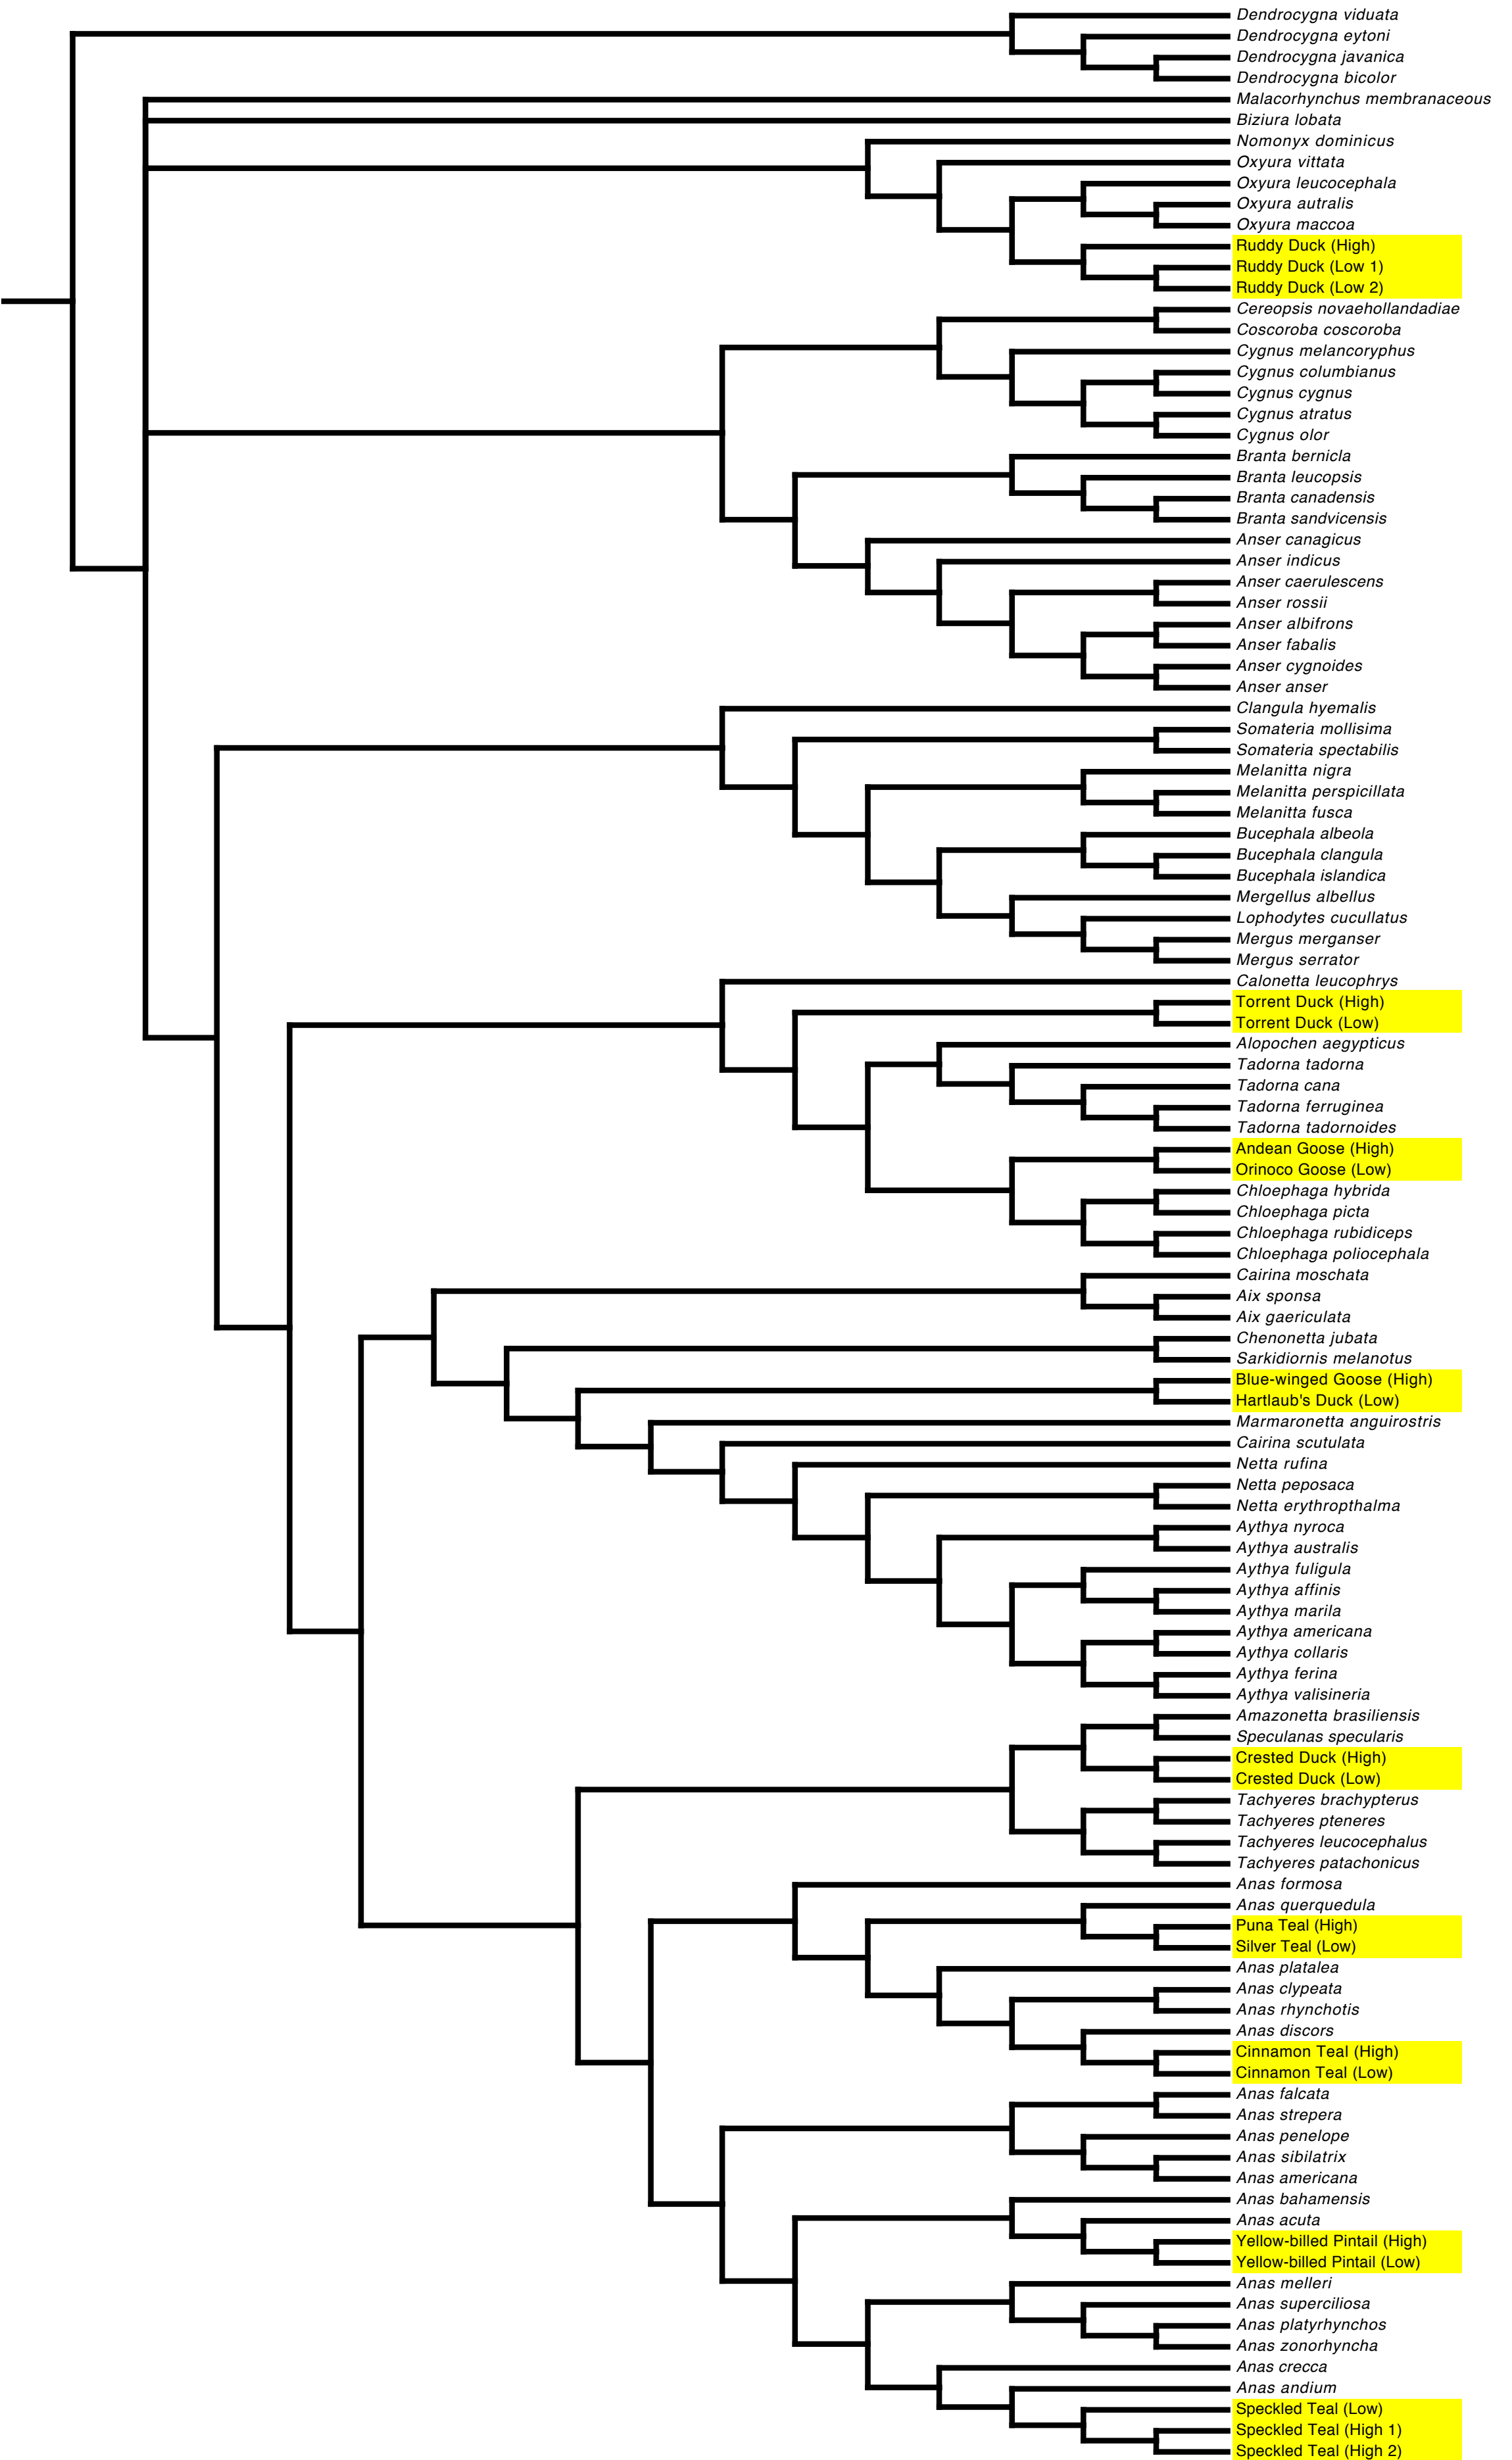

Supplement: S3 (10.1371/journal.pgen.1005681.s003) [file journal.pgen.1005681.s003.PDF]
