# Supplementary material for: Convergent Evolution of Hemoglobin Function in High-Altitude Andean Waterfowl Involves Limited Parallelism at the Molecular Sequence Level
Source: PLOS journal article supplement (doi:10.1371/journal.pgen.1005681), 2015-12-04

$\beta 116\text{Ser} + \beta 133\text{Met}$

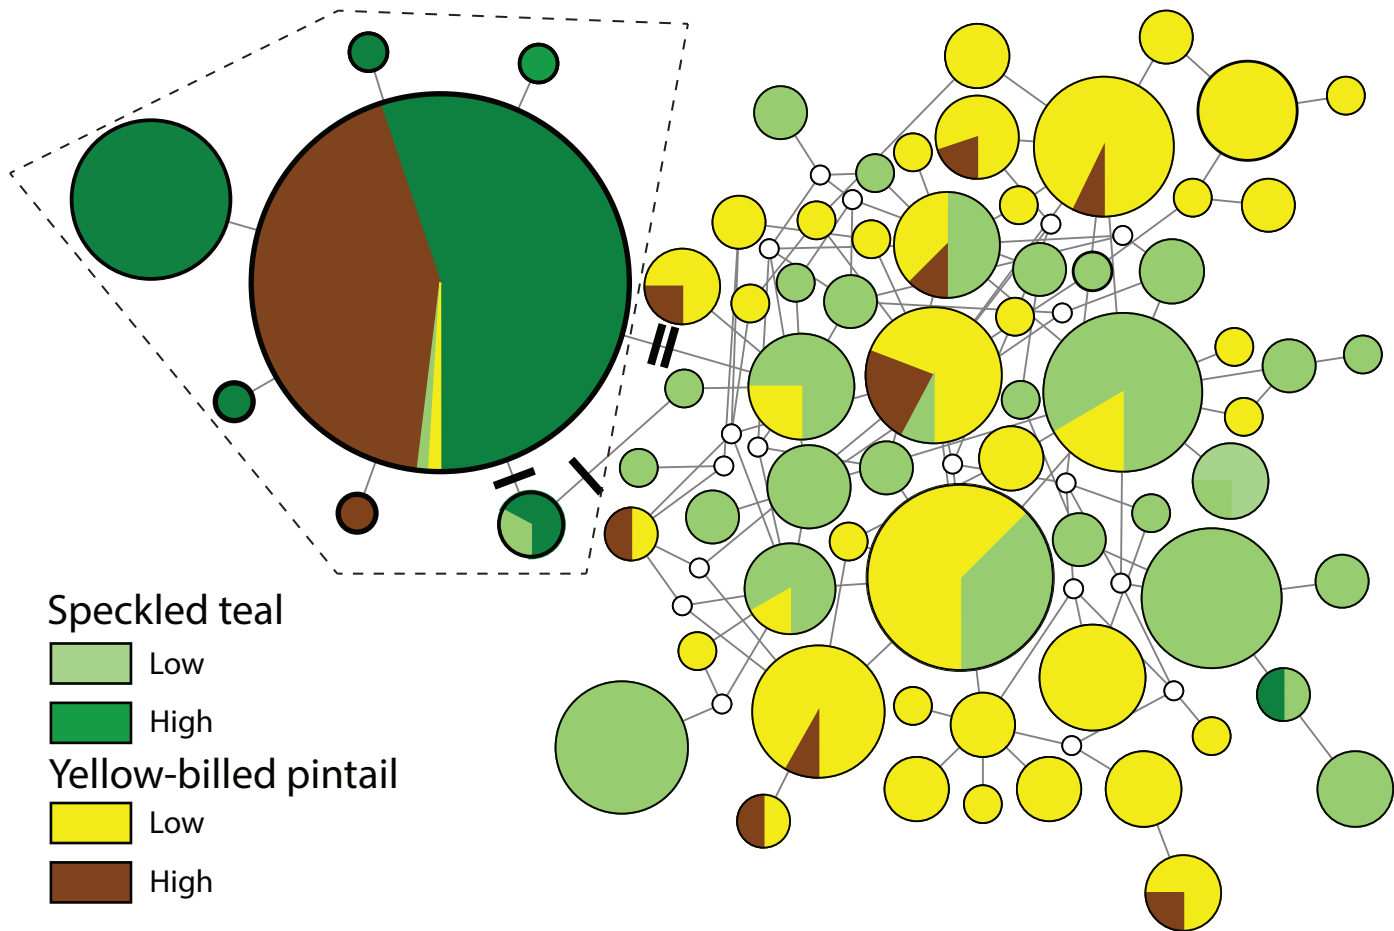

Supplement: S6 (10.1371/journal.pgen.1005681.s006) [file journal.pgen.1005681.s006.PDF]
