# Supplementary material for: Convergent Evolution of Hemoglobin Function in High-Altitude Andean Waterfowl Involves Limited Parallelism at the Molecular Sequence Level
Source: PLOS journal article supplement (doi:10.1371/journal.pgen.1005681), 2015-12-04

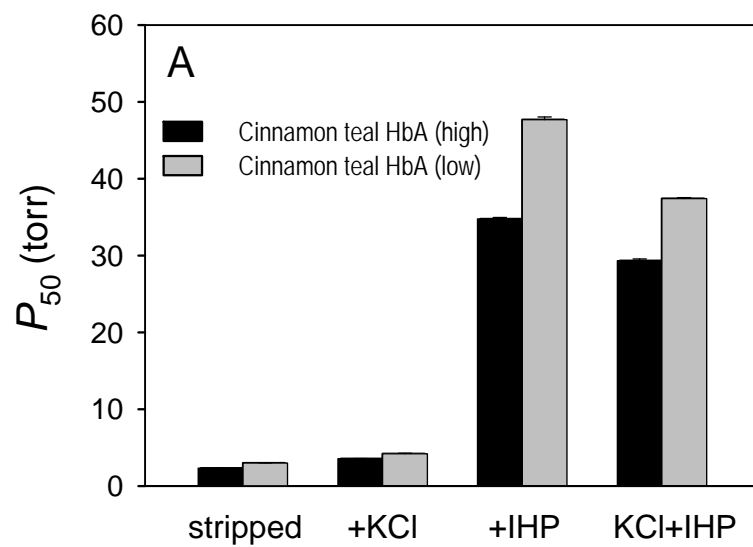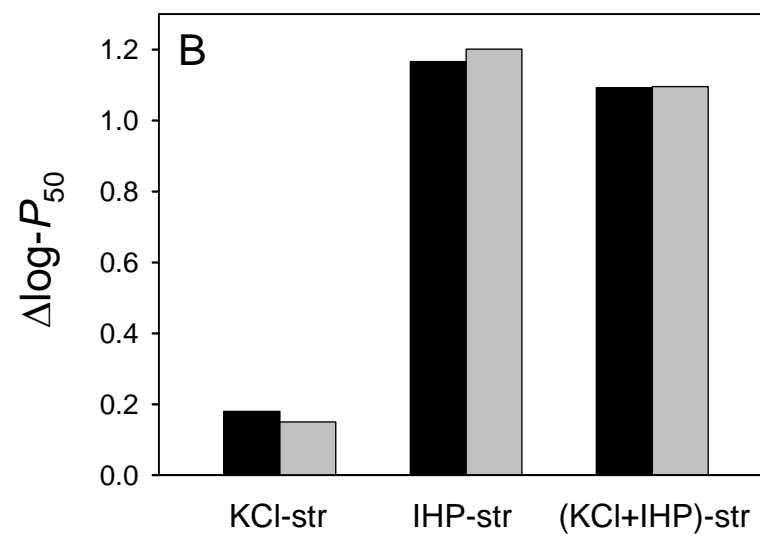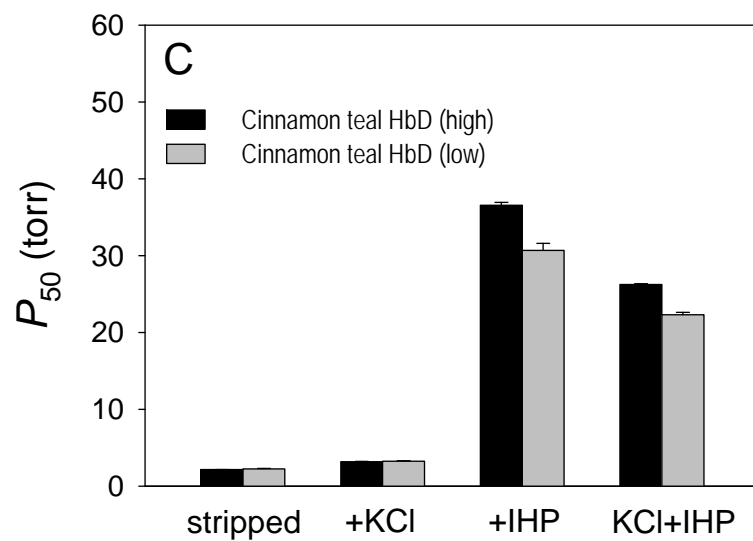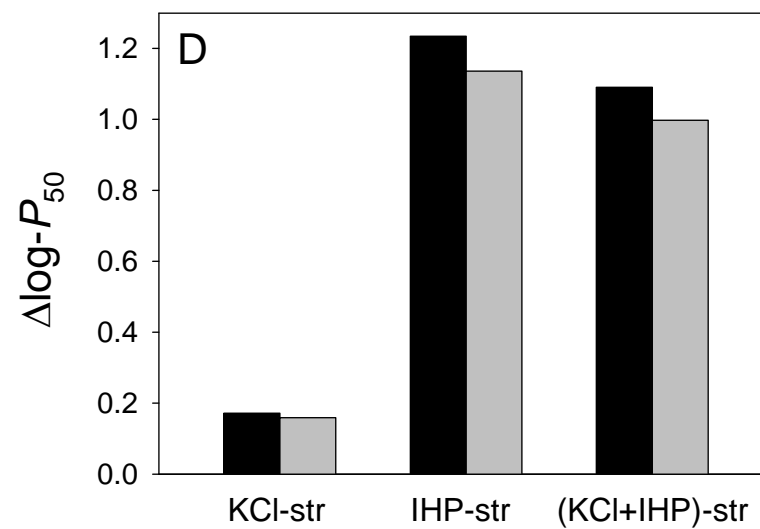

Supplement: S7 (10.1371/journal.pgen.1005681.s007) [file journal.pgen.1005681.s007.PDF]
